# Supplementary material for: Pillar[5]arene-based phosphine oxides: novel ionophores for solvent extraction separation of f-block elements from acidic media
Source: Royal Society of Chemistry journal article supplement (doi:10.1039/c3ra41251b), 2013-01-01
Supplement: c3ra41251b.pdf [file c3ra41251b.pdf]

**Pillar[5]arene-based phosphine oxides: novel  
ionophores for solvent extraction separation of  
f-block elements from acidic media**

Yuyu Fang, Lei Wu, Jiali Liao, Long Chen, Yuanyou Yang, Ning Liu, Lutao He,  
Shuliang Zou, Wen Feng,\* Lihua Yuan\*

*Institute of Nuclear Science and Technology, Key Laboratory for Radiation Physics  
and Technology of Ministry of Education, College of Chemistry, Sichuan University,  
Chengdu 610064, China. Fax: +86-28-85418755; Tel: +86-28-85416996; E-mail:  
lhyuan@scu.edu.cn; wfeng9510@scu.edu.cn.*

**Supporting Information**

## Contents

|                                                         |           |
|---------------------------------------------------------|-----------|
| <b>1. General Information.....</b>                      | <b>3</b>  |
| <b>2. NMR and ESI-HRMS Spectra .....</b>                | <b>4</b>  |
| <b>3. Extraction of Lanthanides and Actinides .....</b> | <b>16</b> |

## 1. General Information

The  $^1\text{H}$  NMR and  $^{13}\text{C}$  NMR spectra were recorded on Bruker AVANCE AV II- 400 MHz ( $^1\text{H}$ : 400 MHz;  $^{13}\text{C}$ : 100 MHz). Chemical shifts are reported in  $\delta$  values in ppm using tetramethylsilane (TMS) and coupling constants (J) are denoted in Hz. Multiplicities are denoted as follows: s = singlet, d = doublet, t = triplet, dd = double doublet and m = multiplet. High resolution mass (HRMS) data were obtained by WATERS Q-TOF Premier. Solvents for extraction and chromatography were reagent grade.  $\text{CH}_2\text{Cl}_2$  was distilled from  $\text{CaH}_2$ .  $\text{CDCl}_3$  were from Cambridge Isotope Laboratories (CIL). UV- spectra were measured by SHIMADZU UV-2450. Inductive coupled plasma atomic emission spectroscopy (ICP-AES) measurements were made by Thermo Elemental, U.S.A.

## 2. NMR and ESI-HRMS Spectra

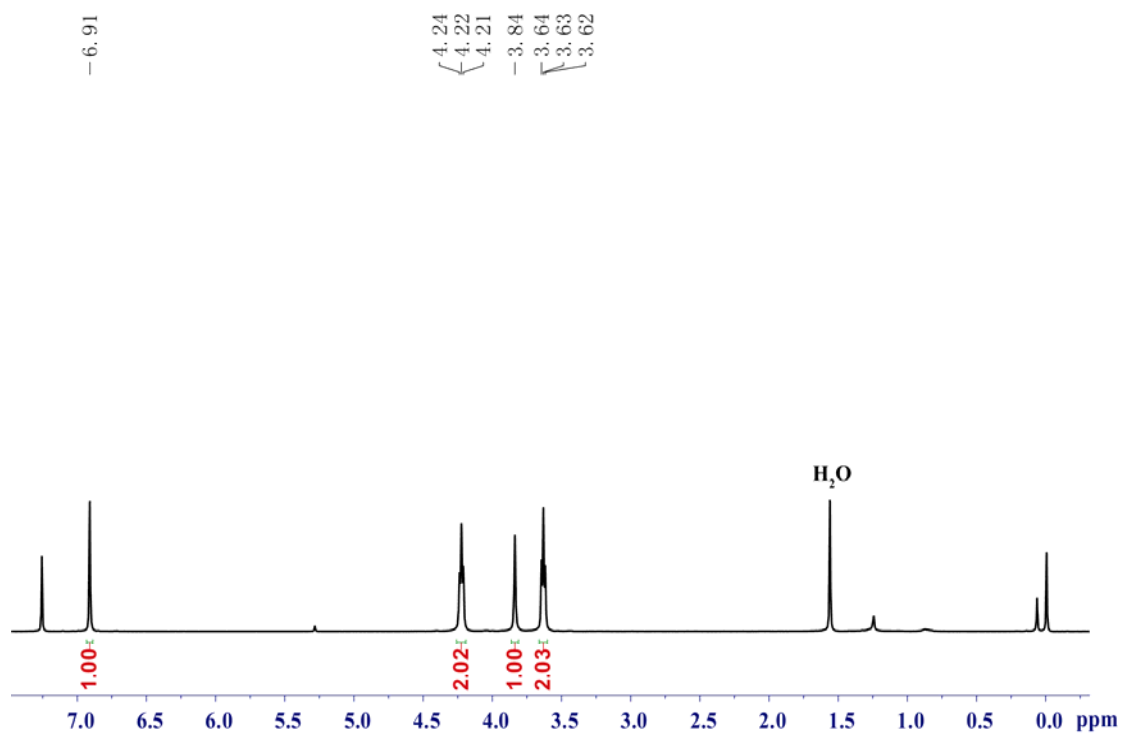

**Figure S1.** <sup>1</sup>H NMR spectrum (400 MHz, CDCl<sub>3</sub>) of **4a**.

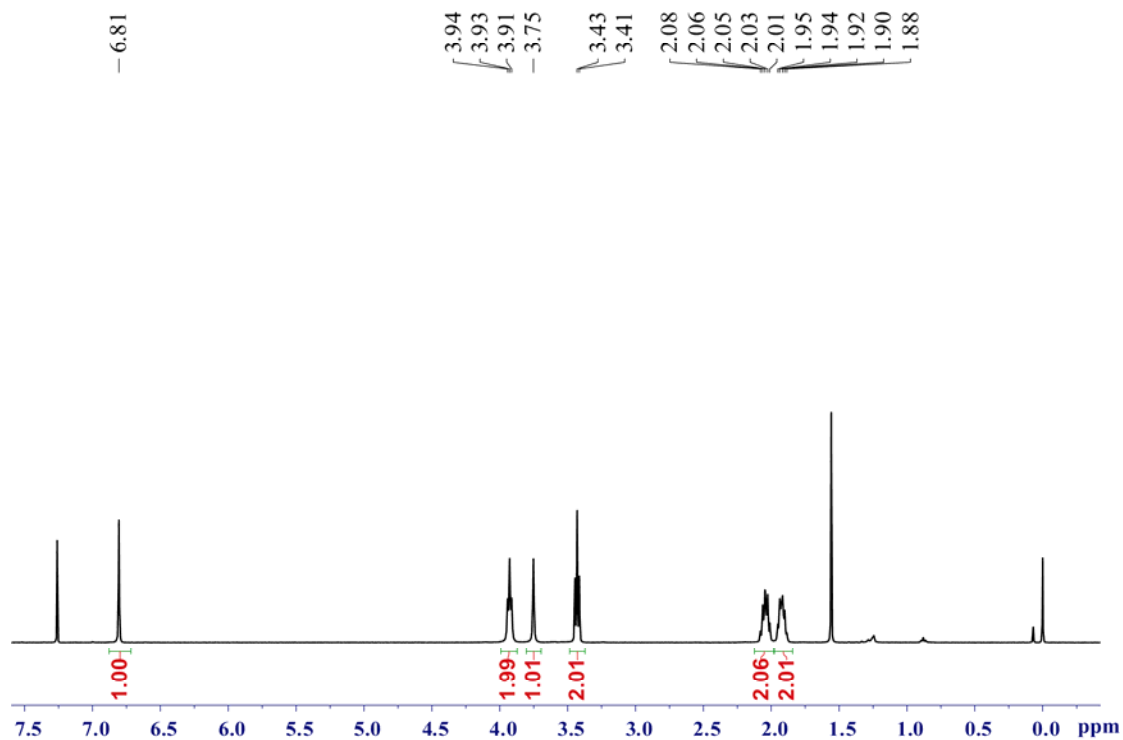

Figure S2.  $^1\text{H}$  NMR spectrum (400 MHz,  $\text{CDCl}_3$ ) of **4b**.

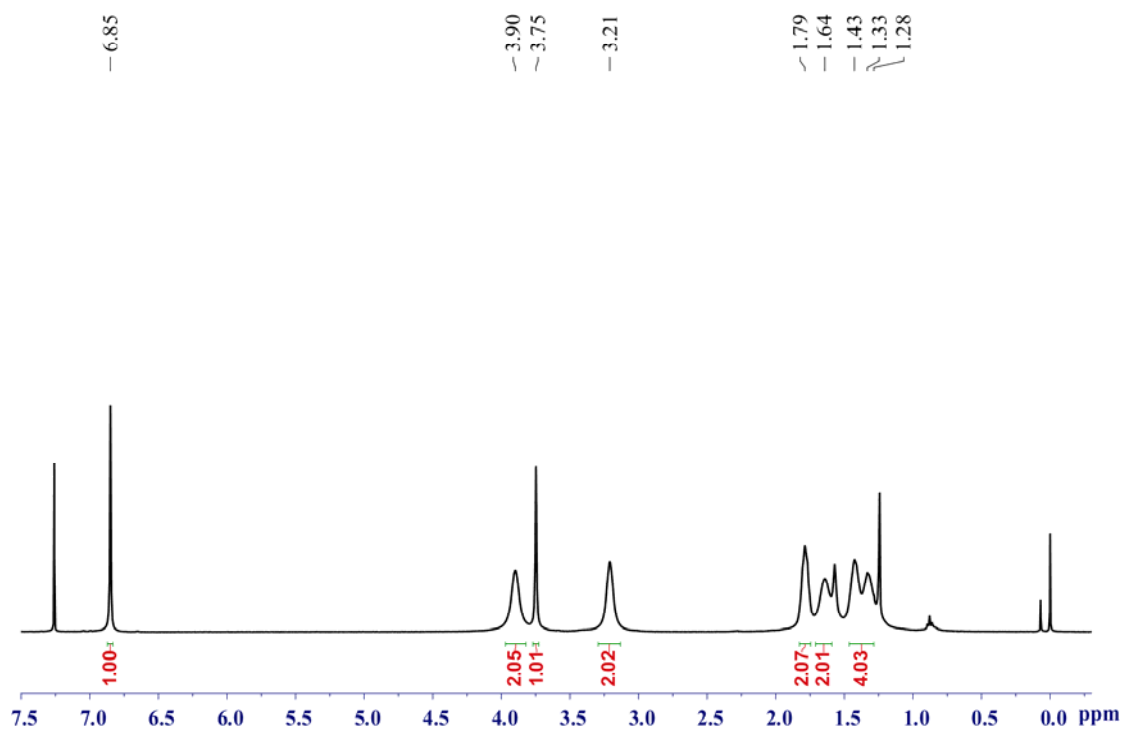

Figure S3.  $^1\text{H}$  NMR spectrum (400 MHz,  $\text{CDCl}_3$ ) of **4c**.

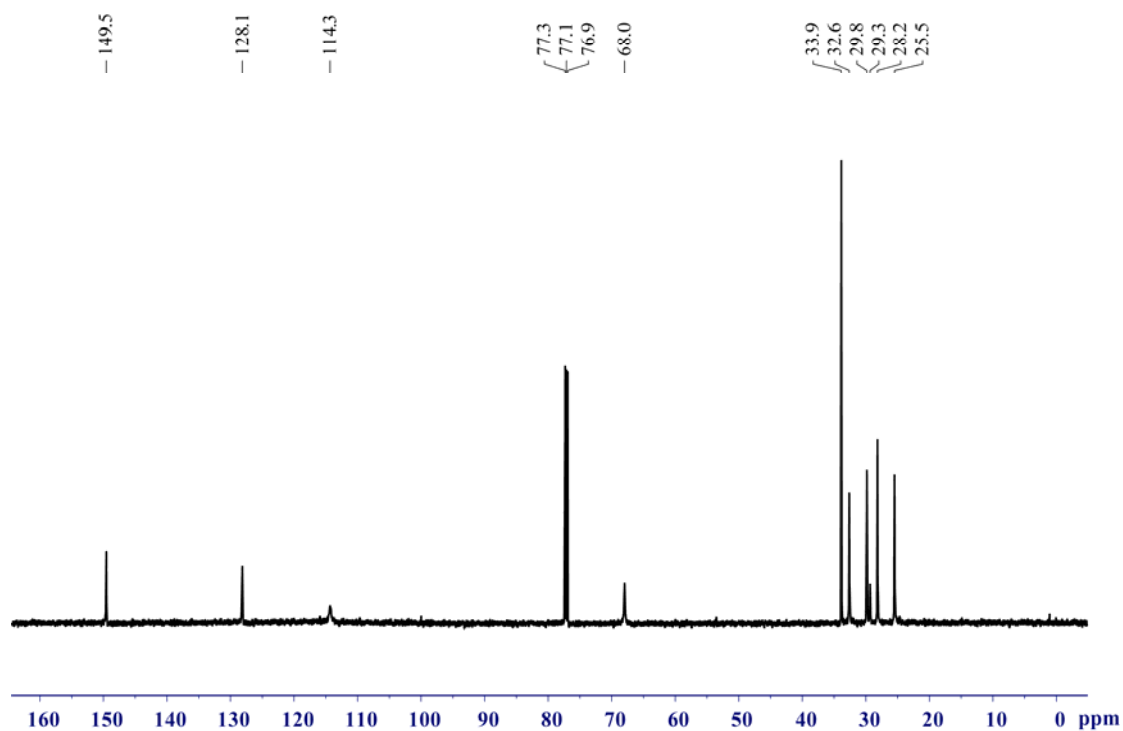

Figure S4.  $^{13}\text{C}$  NMR spectrum (100 MHz,  $\text{CDCl}_3$ ) of **4c**.

12:45:52

121231\_4C 41 (0.705) AM (Cen,4, 80.00, Ar,10000.0,0.00,0.70); Sm (SG, 2x3.00); Cm (8:59)

31-Dec-2012

TOF MS ES+  
694

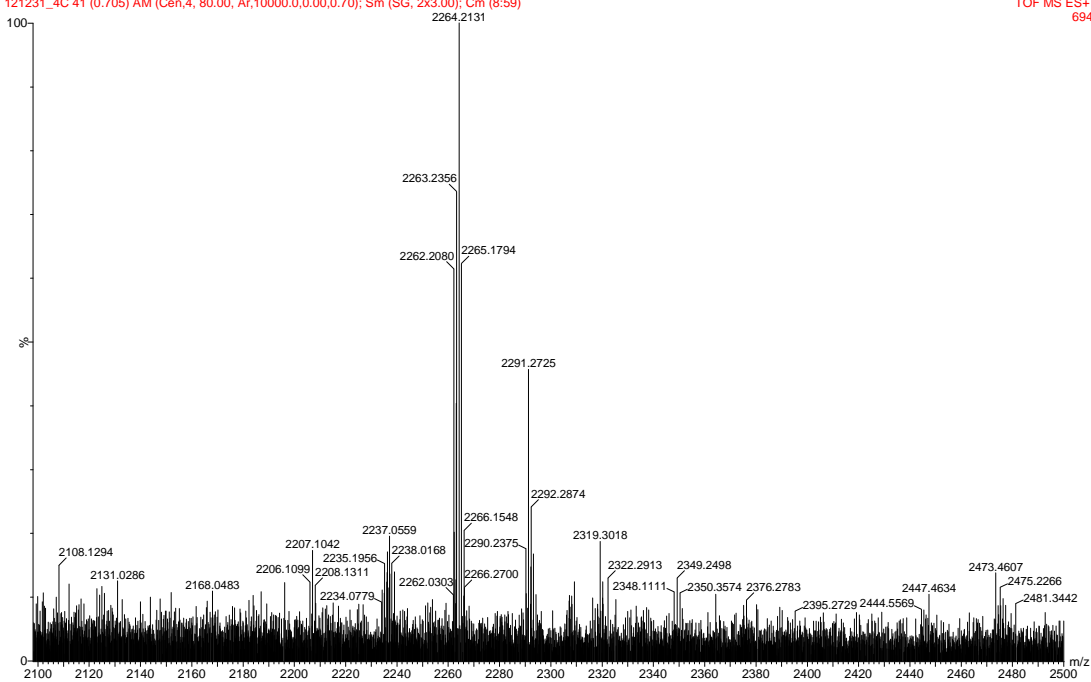

Figure S5. ESI-HRMS spectrum of **4c**.

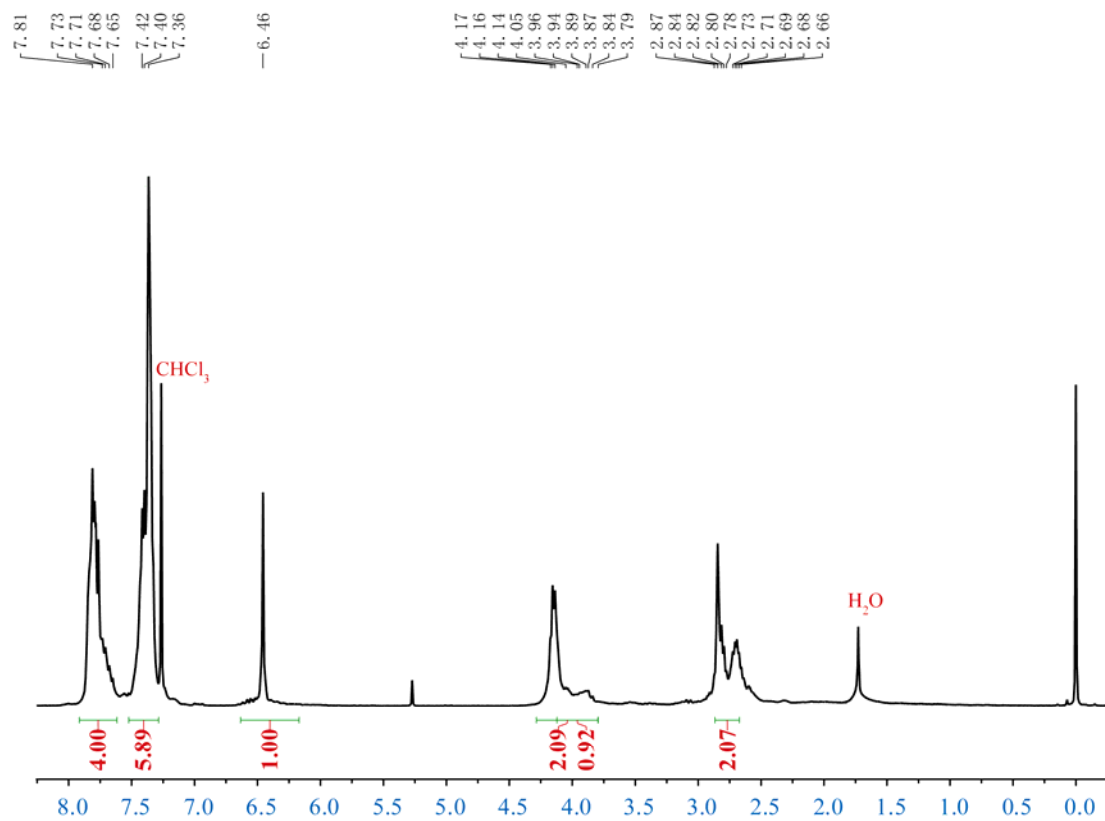

Figure S6. <sup>1</sup>H NMR spectrum (400 MHz, CDCl<sub>3</sub>) of **1a**.

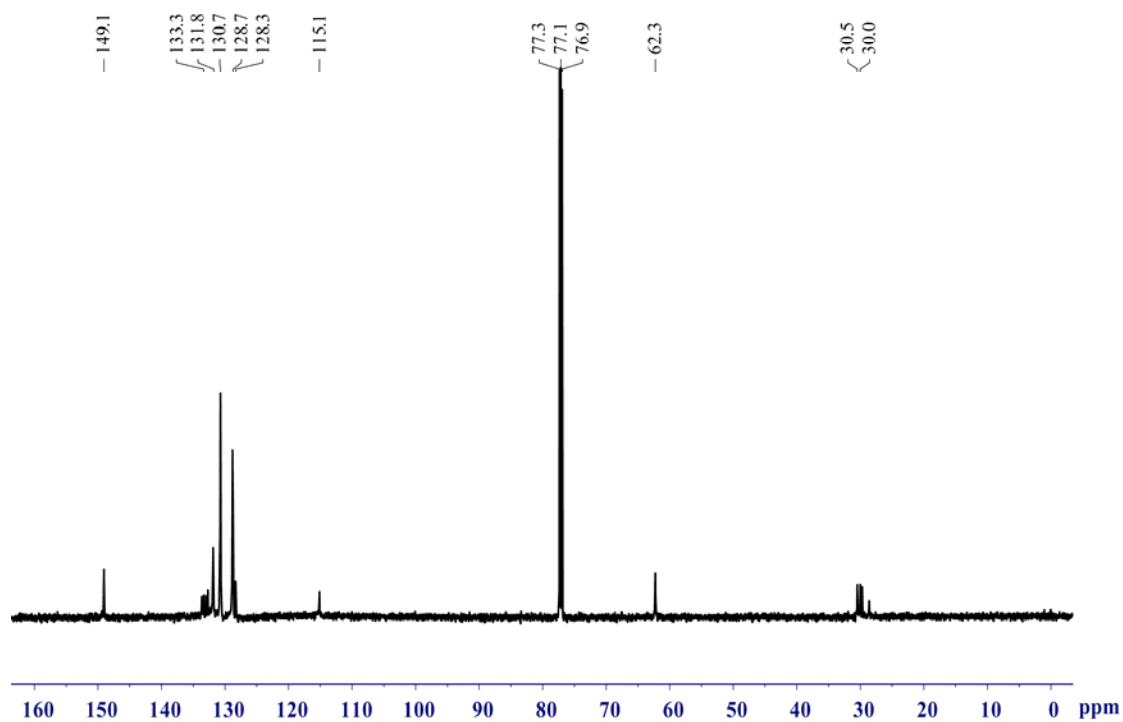

Figure S7. <sup>13</sup>C NMR spectrum (100 MHz, CDCl<sub>3</sub>) of **1a**.

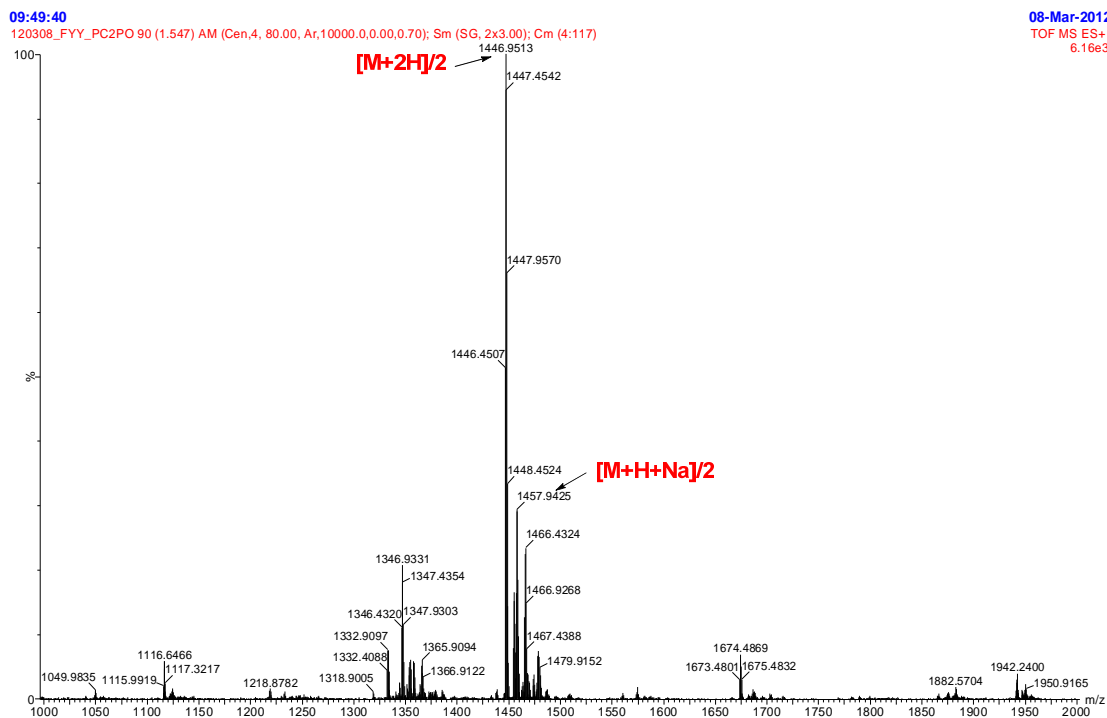

Figure S8. ESI-HRMS spectrum of **1a**.

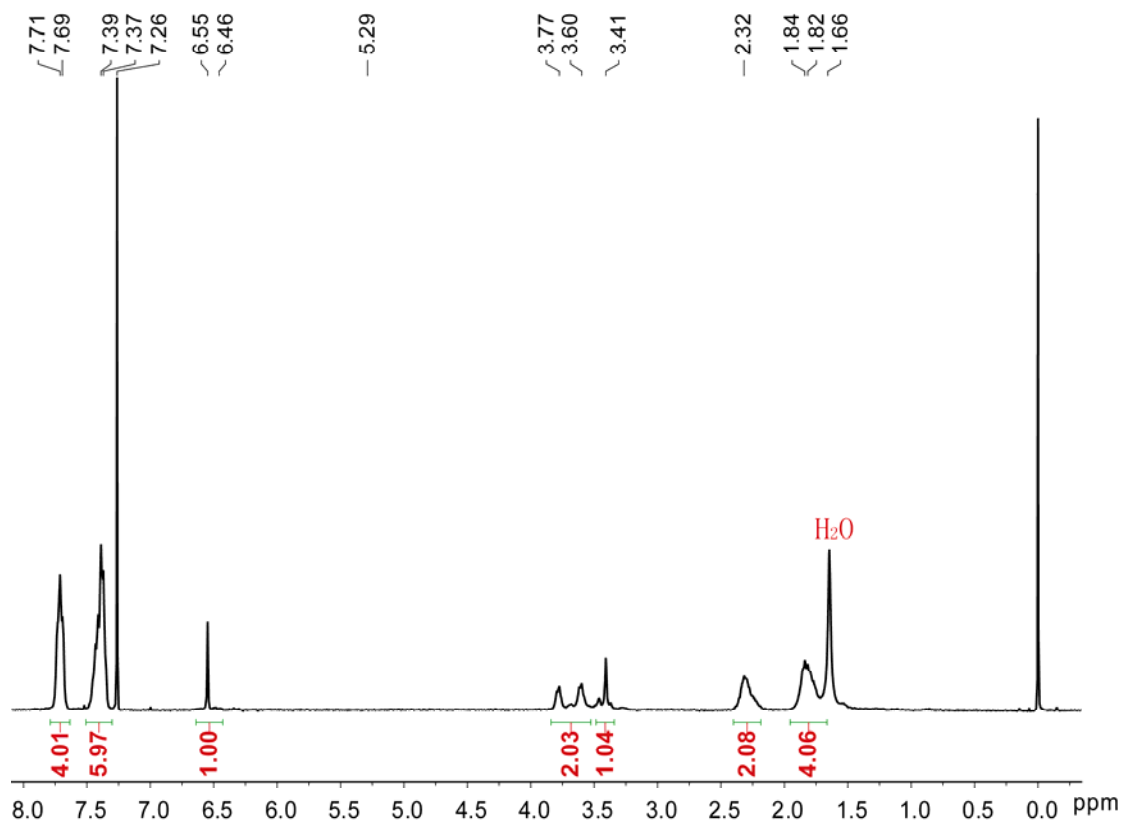

Figure S9. <sup>1</sup>H NMR spectrum (400 MHz, CDCl<sub>3</sub>) of **1b**.



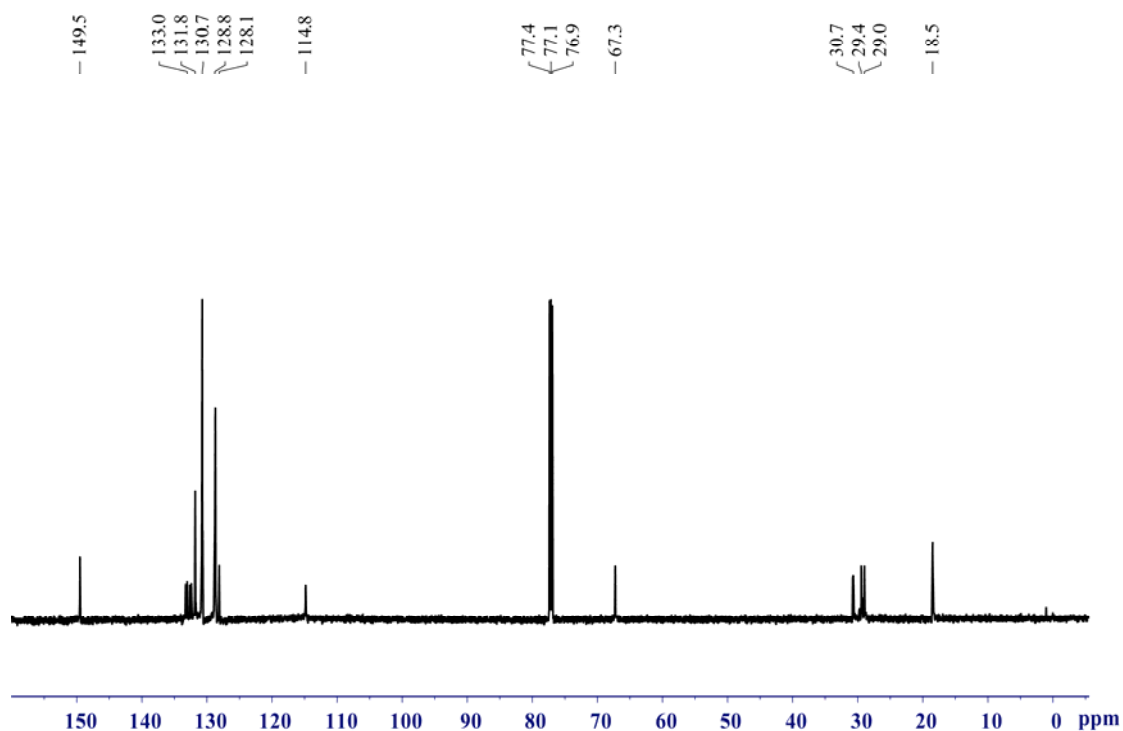

Figure 10.  $^{13}\text{C}$  NMR spectrum (100 MHz,  $\text{CDCl}_3$ ) of **1b**.

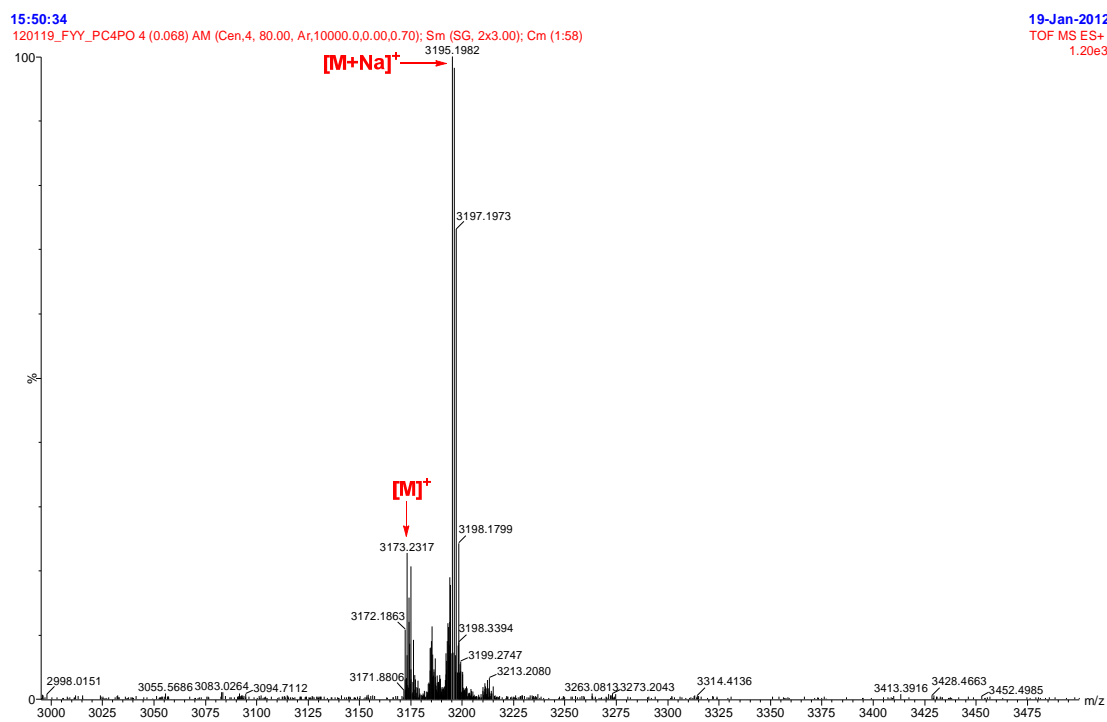

Figure S11. ESI-HRMS spectrum of **1b**.

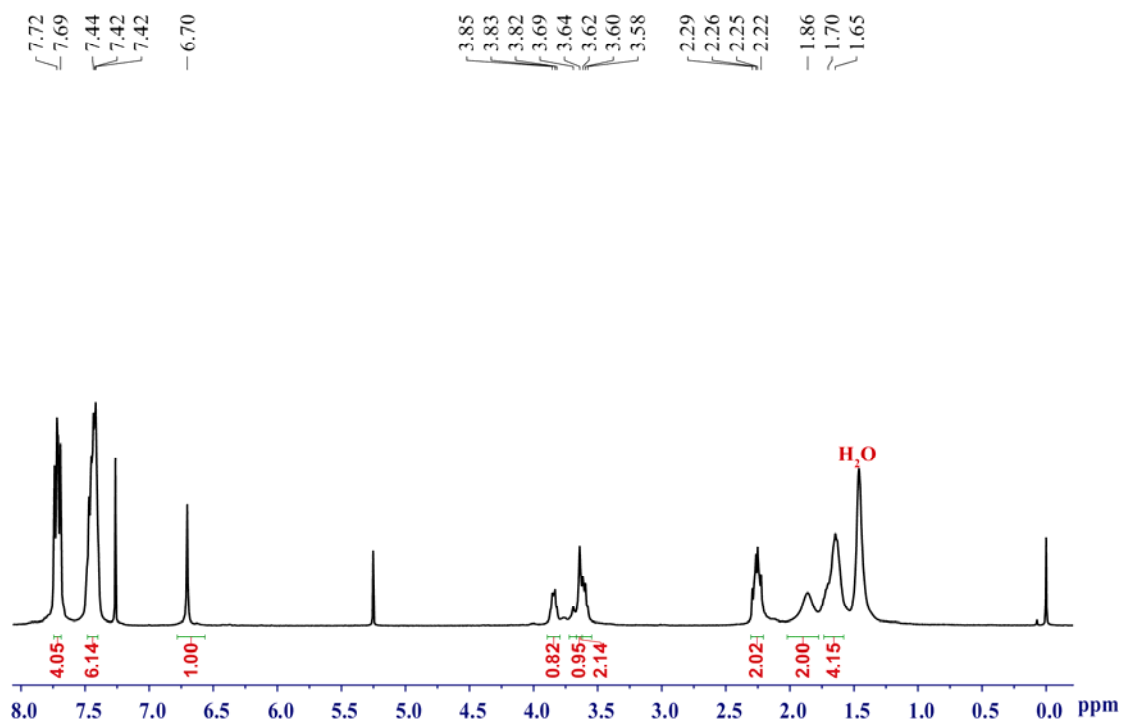

**Figure S12** <sup>1</sup>H NMR spectrum (400 MHz, CDCl<sub>3</sub>) of **1c**.

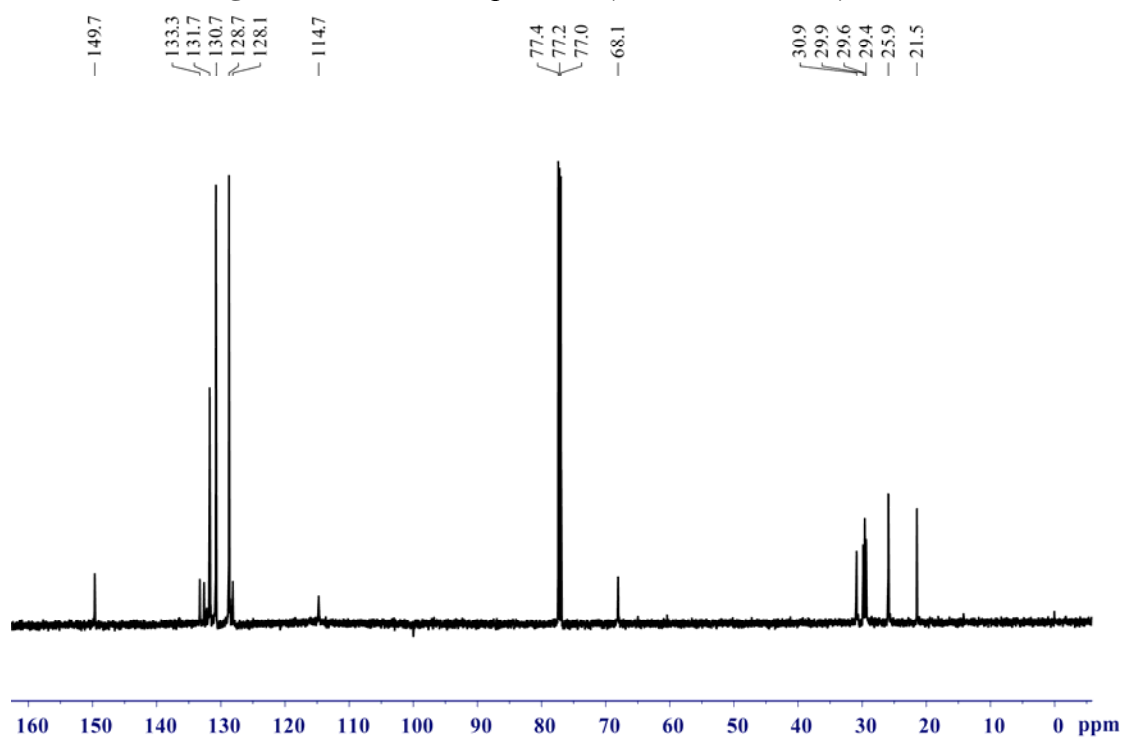

**Figure S13** <sup>13</sup>C NMR spectrum (100 MHz, CDCl<sub>3</sub>) of **1c**.

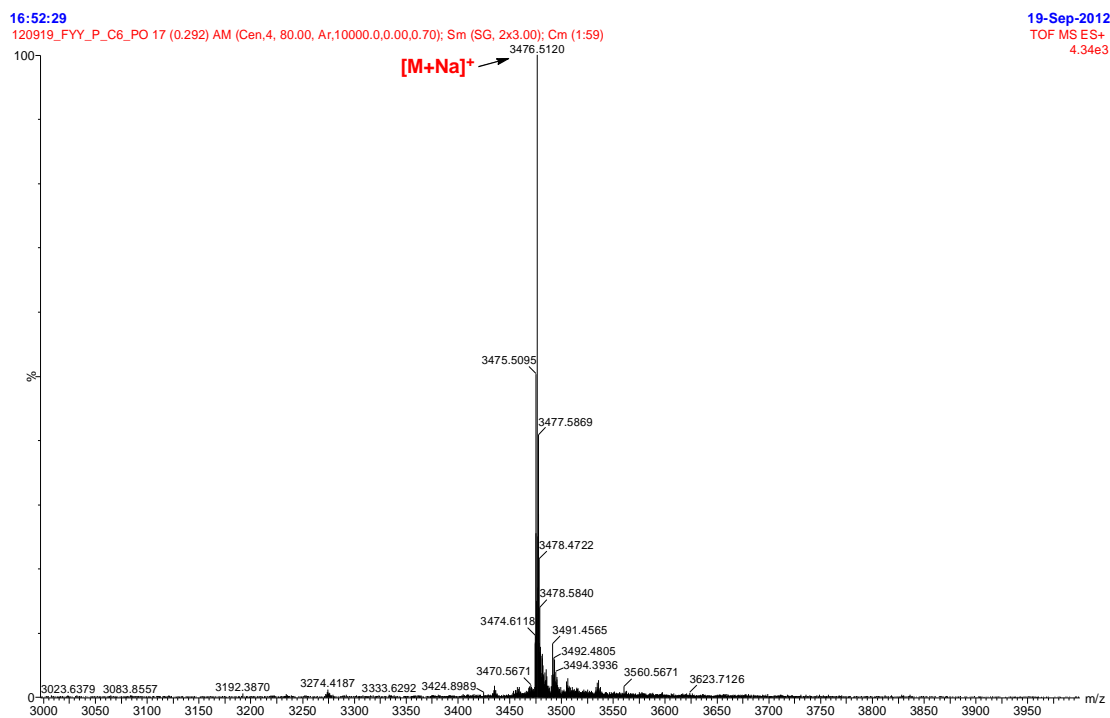

Figure S14. ESI-HRMS spectrum of **1c**.

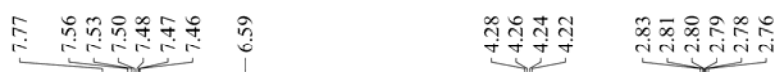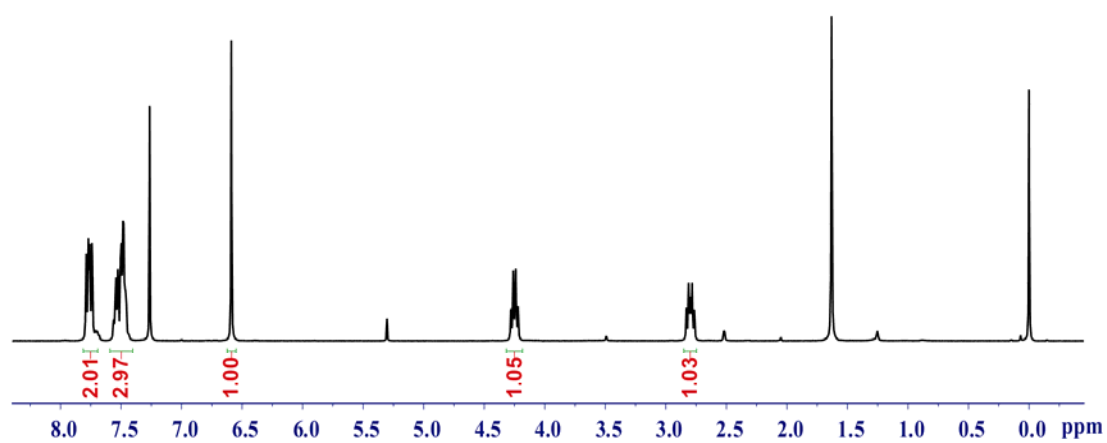

Figure S15.  $^1\text{H}$  NMR spectrum (400 MHz,  $\text{CDCl}_3$ ) of **2a**.

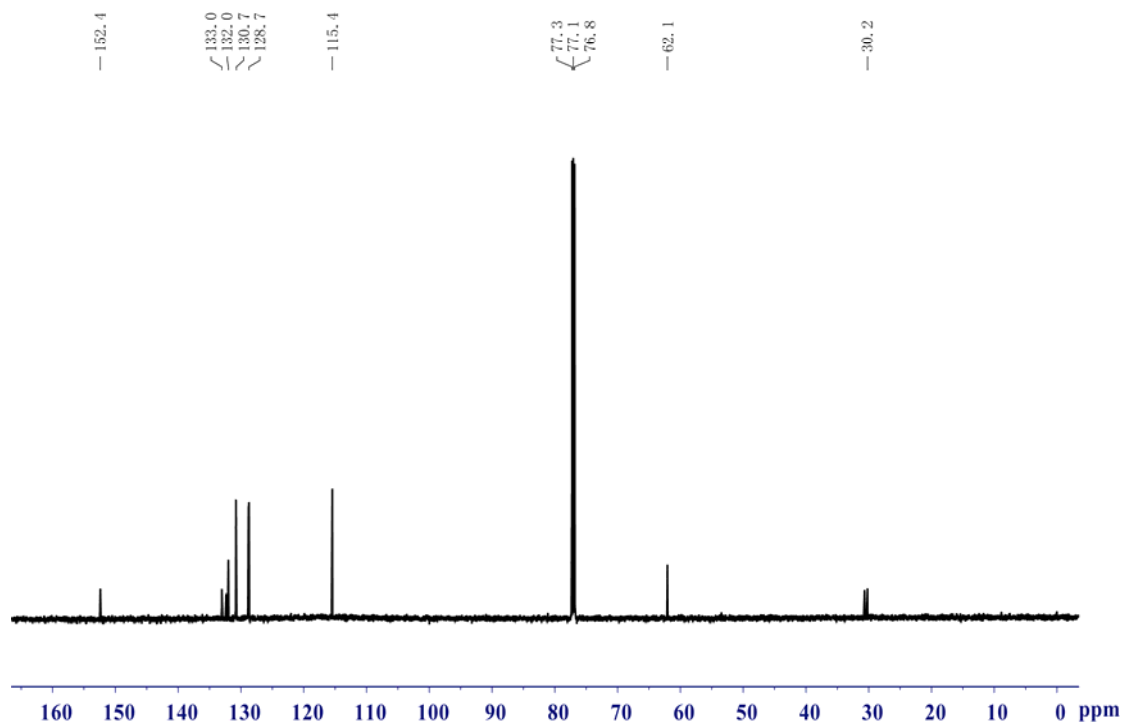

Figure S16 <sup>13</sup>C NMR spectrum (400 MHz, CDCl<sub>3</sub>) of 2a.

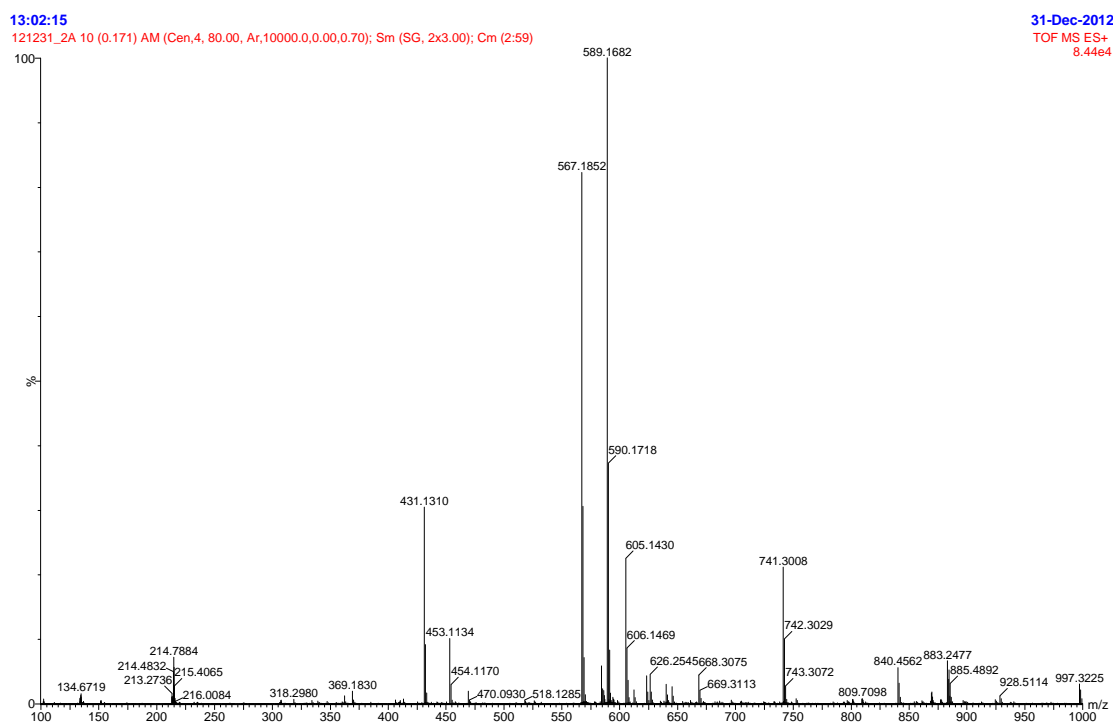

Figure S17. ESI-HRMS spectrum of 2a.

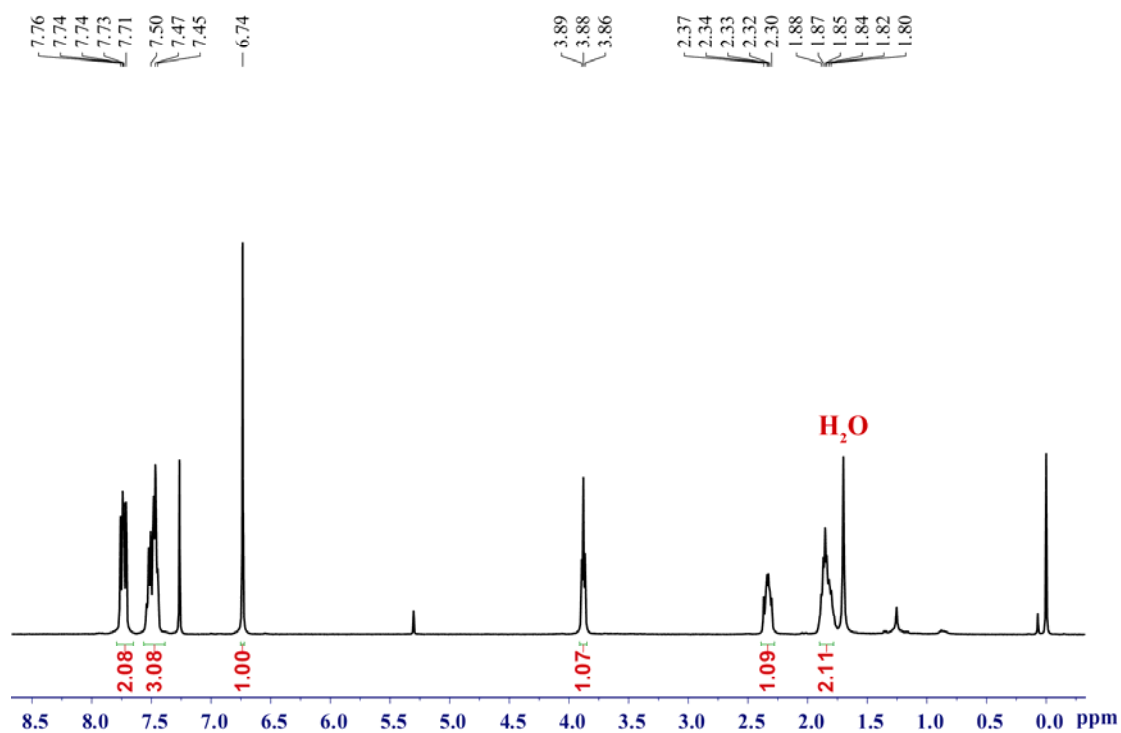

**Figure S18.** <sup>1</sup>H NMR spectrum (400 MHz, CDCl<sub>3</sub>) of **2b**.

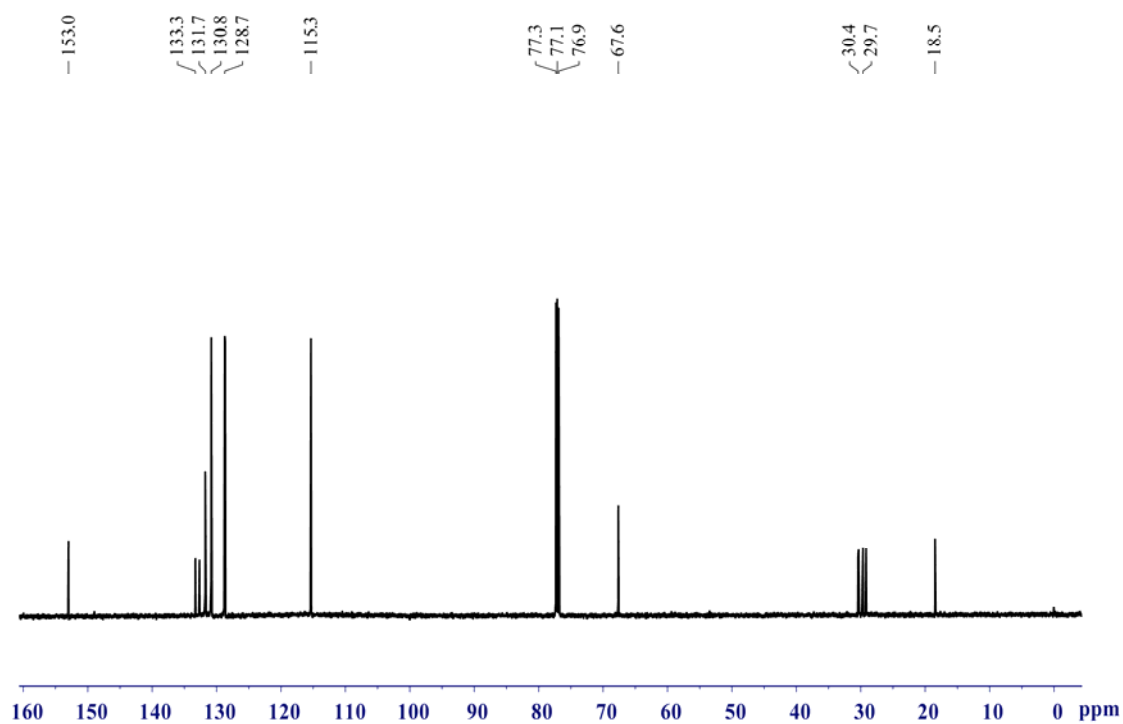

**Figure S19** <sup>13</sup>C NMR spectrum (400 MHz, CDCl<sub>3</sub>) of **2b**.

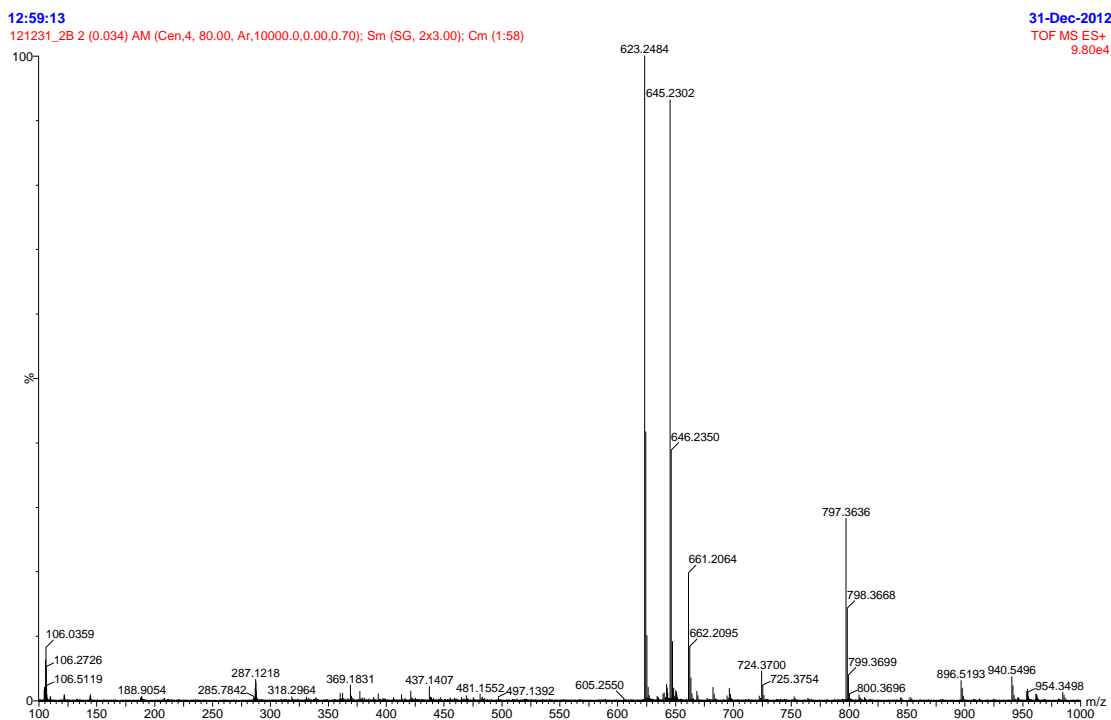

Figure S20. ESI-HRMS spectrum of **2b**.

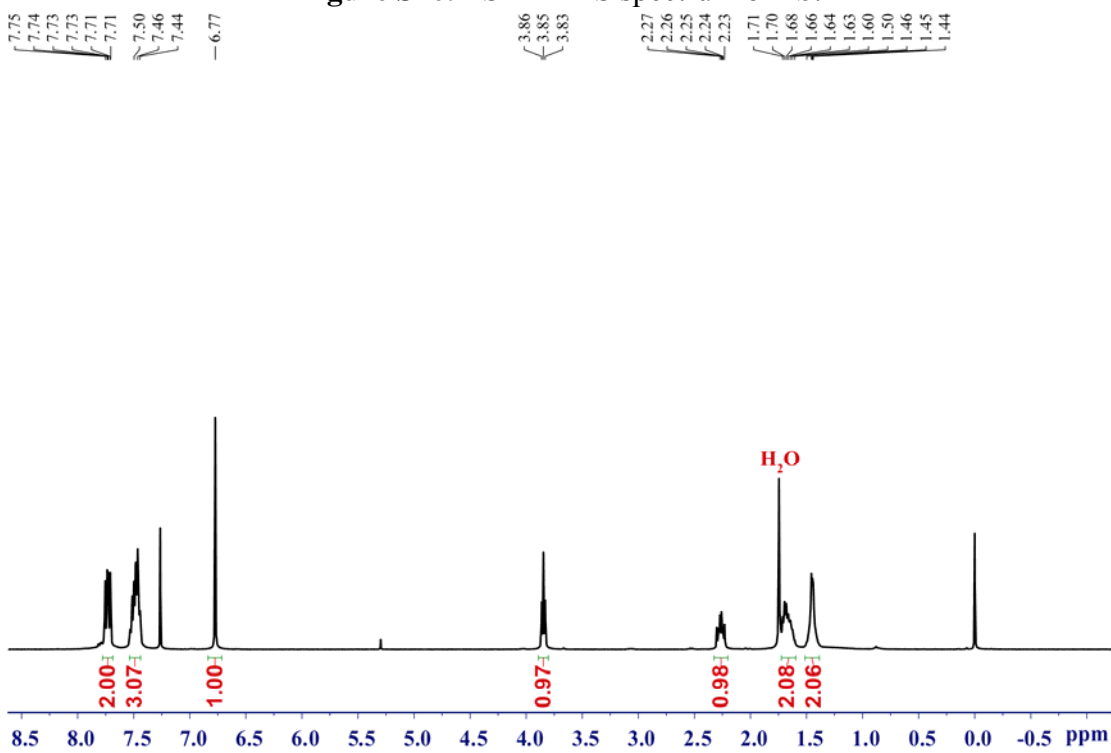

Figure S21. <sup>1</sup>H NMR spectrum (400 MHz, CDCl<sub>3</sub>) of **2c**.

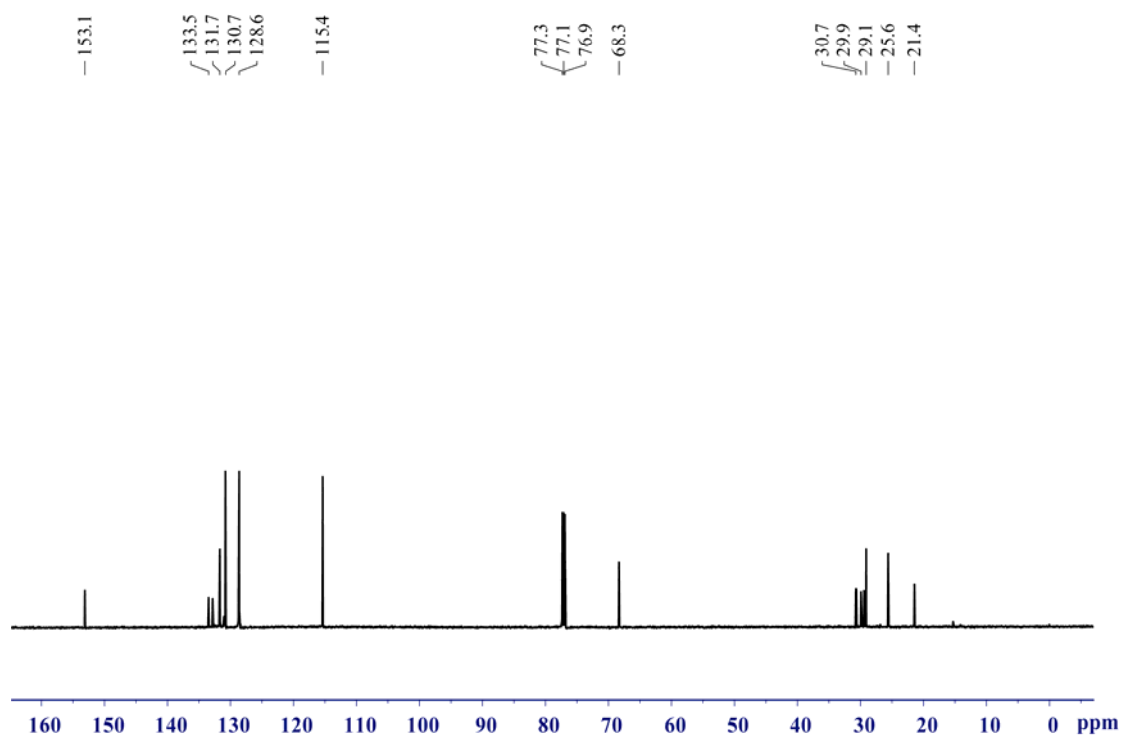

Figure S22 <sup>13</sup>C NMR spectrum (400 MHz, CDCl<sub>3</sub>) of 2c.

13:05:39

121231\_2C 54 (0.923) AM (Cen,4, 80.00, Ar,10000.0,0.00,0.70); Sm (SG, 2x3.00); Cm (2:59)

31-Dec-2012

TOF MS ES+  
8.02e4

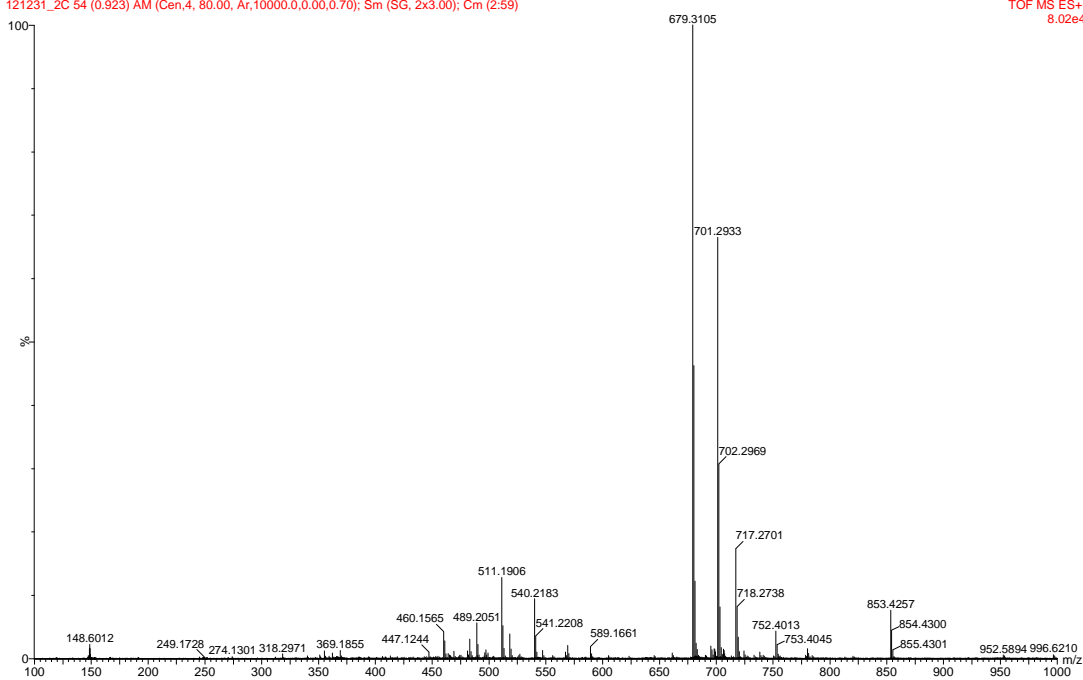

Figure S23. ESI-HRMS spectrum of 2c.

### 3. The Extraction of Lanthanides and Actinides

**Table S1** Separation factors (SF) of f-element cations for **1** and **2a** ( $1.0 \times 10^{-3}$  M) from 1 M HNO<sub>3</sub> aqueous solution into dichloromethane ( $T = 20 \pm 1^\circ\text{C}$ ).

| Cations          | <b>1a</b>                    |                             | <b>1b</b>                    |                             | <b>1c</b>                    |                             | <b>2a</b>                    |
|------------------|------------------------------|-----------------------------|------------------------------|-----------------------------|------------------------------|-----------------------------|------------------------------|
|                  | $D_{\text{Th}}/D_{\text{M}}$ | $D_{\text{U}}/D_{\text{M}}$ | $D_{\text{Th}}/D_{\text{M}}$ | $D_{\text{U}}/D_{\text{M}}$ | $D_{\text{Th}}/D_{\text{M}}$ | $D_{\text{U}}/D_{\text{M}}$ | $D_{\text{Th}}/D_{\text{M}}$ |
| La <sup>3+</sup> | 1.02                         | 4.15                        | 6.78                         | 109                         | 12.2                         | 70.7                        | 0.32                         |
| Ce <sup>3+</sup> | 1.14                         | 4.65                        | 3.83                         | 61.6                        | 12.0                         | 69.5                        | 0.31                         |
| Pr <sup>3+</sup> | 1.08                         | 4.38                        | 4.14                         | 66.5                        | 11.7                         | 67.8                        | 0.30                         |
| Nd <sup>3+</sup> | 1.45                         | 5.91                        | 3.31                         | 53.1                        | 11.2                         | 65.3                        | 0.32                         |
| Sm <sup>3+</sup> | 1.44                         | 5.85                        | 3.68                         | 59.2                        | 9.76                         | 56.7                        | 0.34                         |
| Eu <sup>3+</sup> | 1.47                         | 5.98                        | 3.38                         | 54.3                        | 11.4                         | 66.1                        | 0.32                         |
| Gd <sup>3+</sup> | 1.34                         | 5.46                        | 4.44                         | 71.3                        | 11.1                         | 64.5                        | 0.36                         |
| Yb <sup>3+</sup> | 1.57                         | 6.43                        | 3.96                         | 63.6                        | 16.3                         | 94.5                        | 0.38                         |
| Lu <sup>3+</sup> | 1.38                         | 5.60                        | 4.74                         | 76.2                        | 14.5                         | 84                          | 0.41                         |
| Th <sup>4+</sup> | --                           | 4.07                        | --                           | 16.1                        | --                           | 5.89                        |                              |

**Table S2** Extraction percentage (%E) and separation factors (SF) of thorium(IV) and uranyl(VI) nitrates from 1 M HNO<sub>3</sub> and various sodium nitrate aqueous solution into dichloromethane containing the ligand **1b** ( $T = 20 \pm 1^\circ\text{C}$ ).

| Cations                       | n M NaNO <sub>3</sub> + 1 M HNO <sub>3</sub> (n = 0-4) |      |      |      |      |
|-------------------------------|--------------------------------------------------------|------|------|------|------|
|                               | 0 M                                                    | 1 M  | 2 M  | 3 M  | 4 M  |
| Th <sup>4+</sup>              | 23.6                                                   | 28.7 | 30.7 | 30.7 | 30.7 |
| UO <sub>2</sub> <sup>2+</sup> | 56.0                                                   | 64.1 | 74.0 | 80.7 | 83.0 |
| $D_{\text{U}}/D_{\text{Th}}$  | 4.12                                                   | 4.44 | 6.42 | 9.43 | 11.0 |
